# Supplementary material for: Phantasus, a web application for visual and interactive gene expression analysis
Source: eLife. 2024 Jun 3;13:e85722. doi: 10.7554/eLife.85722 (PMC11147506; doi:10.7554/eLife.85722)
Supplement: Figure 2—source data 1. [file elife-85722-fig2-data1.xlsx]

## Sheet: Sheet1
	Source							Full support	Partial support	Total
	NCBI GEO							96649	40061	136710
			GEO Microarray					49846	27807	77653
					GEO curated annotation			39621	1123	40744
					Parsed user-provided annotation			10225	678	10903
					Other user-provided annotation			0	26006	26006
			GEO RNA-seq					46803	12254	59057
					ARCHs4			35088	7543	42631
							Homo sapiens	16776	4347	21123
							Mus musculus	17031	2880	19911
							Other organisms	1281	316	1597
					DEE2 (not in ARCHs4)			11715	4711	16426
							Homo sapiens	3556	2196	5752
							Mus musculus	3507	1340	4847
							Other organisms	4652	1175	5827
